# Supplementary material for: The Stage-Specific Plasticity of Descending Modulatory Controls in a Rodent Model of Cancer-Induced Bone Pain
Source: MDPI journal article supplement (doi:10.3390/cancers12113286), 2020-11-06

Supplementary

# The stage specific plasticity of descending modulatory controls in a rodent model of cancer induced bone pain

Mateusz Wojciech Kucharczyk <sup>1,2,\*</sup>, Diane Derrien <sup>2</sup>, Anthony Henry Dickenson<sup>2</sup> and Kirsty Bannister <sup>1</sup>

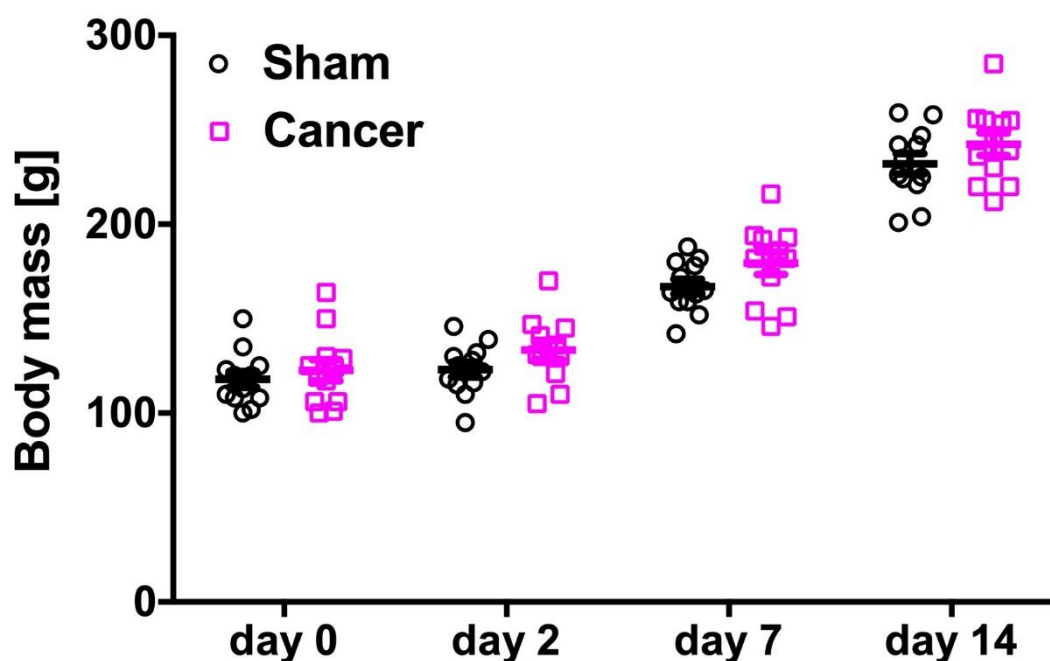

**Figure S1.** Body mass gain in rats after cancer implantation to tibia is shown. Within a timepoint, each dot represents a single animal (n = 12 per group). Data represent the mean  $\pm$  SEM. Kruskal-Wallis H for independent samples: all non-significant.

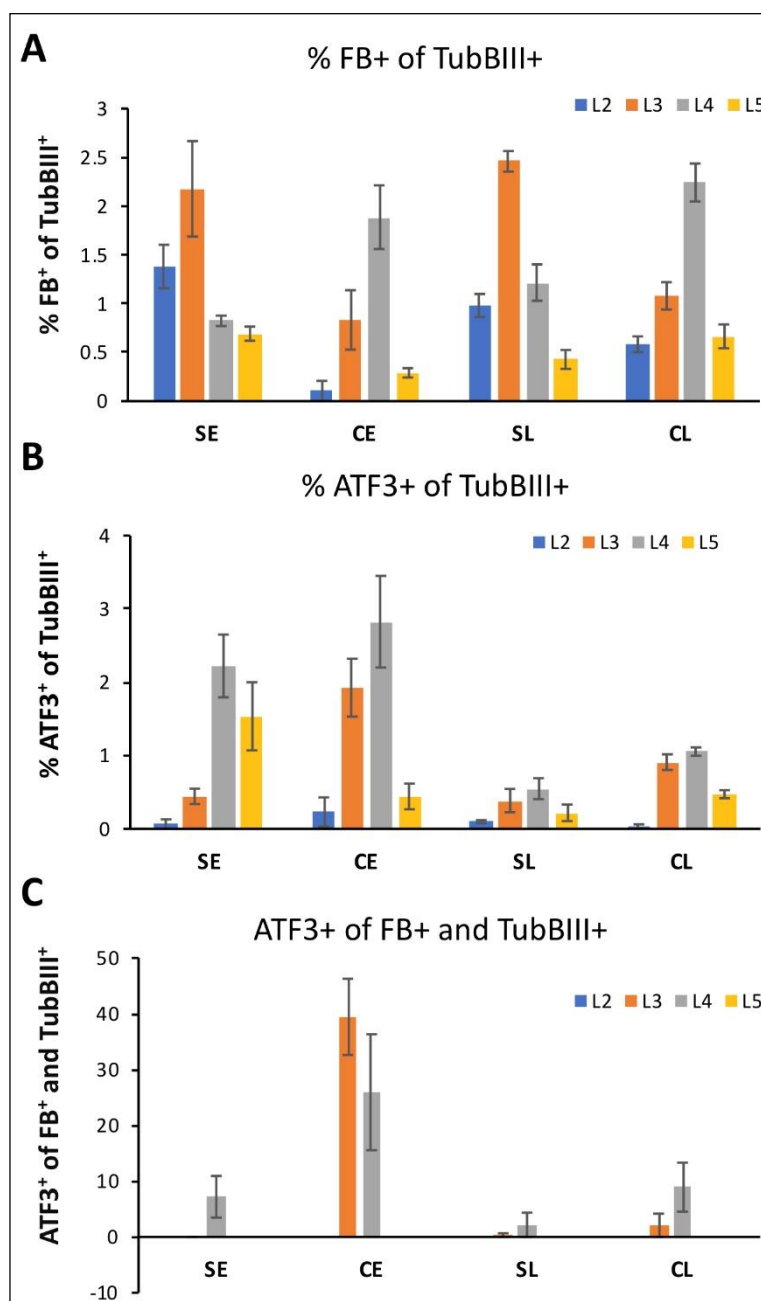

**Figure S2. Detailed Atf3 quantification in separate dorsal root ganglia.** (A) Total number of Fast Blue (FB) traced tibial afferents within ipsilateral L2-5 DRG analysed as a percentage of all neurons (Tubullin- $\beta$ III) therein. On average 100.6  $\pm$  15.7 L2-5 DRG neurons innervate tibia. No FB positivity was noticed in the contralateral lumbar DRG (not shown). (B) Quantification of all Atf3<sup>+</sup> afferents within ipsilateral L2-5 DRG, analysed as a percentage of all neurons (Tubullin- $\beta$ III) therein in cancer early (CE, day 7/8) and cancer late (CL, day 14/15) stage groups with corresponding sham groups (early – SE and late – SL). (C) Quantification of Atf3<sup>+</sup> afferents within ipsilateral L2-5 DRG analysed as a percentage of all FB traced neurons. On average 4–20 10  $\mu$ m sections were counted per DRG. Data represent the mean  $\pm$  SEM (n = 3, 'n' denotes a separate animal).

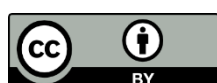

Supplement: s1 [file s1]
